# Supplementary material for: OutLyzer: software for extracting low-allele-frequency tumor mutations from sequencing background noise in clinical practice
Source: PubMed Central journal article supplement (PMC5346729; doi:10.18632/oncotarget.13103), 2016-11-04
Supplement: oncotarget-07-79485-s002.pdf [file oncotarget-07-79485-s002.pdf]

| Tumor Characterization |            |                 |                                                                               | Mutation awaiting |               |                             |                       | Allele ratio detected by corresponding variant caller |        |         |         |
|------------------------|------------|-----------------|-------------------------------------------------------------------------------|-------------------|---------------|-----------------------------|-----------------------|-------------------------------------------------------|--------|---------|---------|
| ID                     | Tumor type | non cellularity | Previously determined molecular profile                                       | Gene              | seq Accession | cNomen                      | pNomen                | haplotypeCaller                                       | Lofreq | Varscan | outLyzr |
| Thera01                | Lung       | >50%            | EGFR Status known for Exons 18 - 19 - 20 - 21                                 | EGFR              | NM_005228     | c.2312_2314dup              | p.Asn771_Pro772insHis | 72,70%                                                | 66%    | 67%     | 66,0%   |
| Thera03                | Lung       | 15-25%          | EGFR Status known for Exons 18 - 19 - 20 - 21<br>KRAS status known for Exon 2 | EGFR              | NM_005228     | c.2235_2249del              | p.Glu746_Ala750del    | 17,50%                                                | 15,50% | 14,82%  | 14,7%   |
| Thera04                | Lung       | >50%            | EGFR Status known for Exons 18 - 19 - 20 - 21                                 | ERBB2             | NM_004448     | c.2313_2324dup              | p.Tyr772_Ala775dup    | 36,40%                                                | 21,80% | 21,87%  | 21,6%   |
| Thera05                | Stomach    | 60%             |                                                                               | KIT               | NM_000222     | c.1669_1683del              | p.Trp557_Glu561del    | 44,70%                                                | 42,80% | 42,75%  | 42,6%   |
|                        | Stomach    |                 |                                                                               | KIT               | NM_000222     | c.2467T>G                   | p.Tyr823Asp           | 61,30%                                                | 57,40% | 57,41%  | 57,5%   |
| Thera06                | Lung       | >50%            | EGFR Status known for Exons 18 - 19 - 20 - 21<br>KRAS status known for Exon 2 | EGFR              | NM_005228     | c.2303_2309delinsCCGTGGACG8 | p.Asp770delinsThrVal  | 17,10%                                                | 15,80% | 16,00%  | 15,6%   |
| Thera07                | Colon      | NA              | RAS status known for Exon 2 - 3 - 4                                           | NRAS              | NM_002524     | c.183A>T                    | p.Gln61His            | 22,20%                                                | 13,20% | 13,24%  | 13,2%   |
| Thera09                | Skin       | 50%             | BRAF status known for exon 15                                                 | BRAF              | NM_004333     | c.1798_1799delinsAG         | p.Val600Arg           | 72,20%                                                | 68,90% | 69,06%  | 69,0%   |
| Thera14                | Ovary      | 20%             | Germline genotype for BRCA1 and BRCA2 known                                   | BRCA1             | NM_007294     | c.3839_3843delinsAGGC       | p.Ser1280X            | 46,50%                                                | 42,00% | 47,00%  | 47,0%   |
| Thera18                | Ovary      | NA              | Germline genotype for BRCA1 and BRCA2 known                                   | BRCA2             | NM_000059     | c.5946del                   | p.Ser1982Argfs*22     | 86,00%                                                | 84,10% | 84,00%  | 83,1%   |
| Thera20                | Ovary      | 80%             | Germline genotype for BRCA1 and BRCA2 known                                   | BRCA1             | NM_007294     | c.2709_2710del              | p.Cys903*             | 74,30%                                                | 71,20% | 71,66%  | 70,5%   |
| Thera22                | Ovary      | 60%             | Germline genotype for BRCA1 and BRCA2 known                                   | BRCA1             | NM_007294     | c.5266dup                   | p.Gln1756Profs*4      | 79,00%                                                | 74,60% | 75,72%  | 74,4%   |
| Thera24                | Ovary      | NA              | Germline genotype for BRCA1 and BRCA2 known                                   | BRCA2             | NM_000059     | c.7069_7070del              | p.Leu2357Valfs*2      | 50,80%                                                | 47,00% | 47,21%  | 46,6%   |
| Thera25                | Ovary      | 70%             | Germline genotype for BRCA1 and BRCA2 known                                   | BRCA1             | NM_007294     | c.2679_2682del              | p.Lys893Asnfs*106     | 76,00%                                                | 70,60% | 70,82%  | 70,1%   |
| Thera26                | Ovary      | 80%             | Germline genotype for BRCA1 and BRCA2 known                                   | BRCA2             | NM_000059     | c.142G>A                    | p.Glu48Lys            | 84%                                                   | 83,50% | 83,52%  | 83,53%  |
| Thera27                | Ovary      | 70%             | Germline genotype for BRCA1 and BRCA2 known                                   | BRCA1             | NM_007294     | c.5266dup                   | p.Gln1756Profs*4      | 77,60%                                                | 70,40% | 70,18%  | 69,9%   |
| Thera29                | Ovary      | 80%             | Germline genotype for BRCA1 and BRCA2 known                                   | BRCA2             | NM_000059     | c.5993_5994del              | p.Gln1998Argfs*4      | 92,60%                                                | 93,20% | 89,17%  | 87,3%   |
| Thera30                | Ovary      | 50%             | Germline genotype for BRCA1 and BRCA2 known<br>KRAS status known for Exon 2   | KRAS              | NM_033360     | c.35G>T                     | p.Gly12Val            | 24,60%                                                | 24,00% | 24,05%  | 24,1%   |
| Thera32                | Colon      | 1               | RAS status known for Exon 2 - 3 - 4                                           | KRAS              | NM_033360     | c.38G>A                     | p.Gly13Asp            | NA                                                    | NA     | 1,31%   | 1,3%    |
| Thera34                | Ovary      | NA              | Germline genotype for BRCA1 and BRCA2 known                                   | BRCA2             | NM_000059     | c.5946del                   | p.Ser1982Argfs*22     | 51,70%                                                | 48,50% | 47,86%  | 47,56%  |
| Thera35                | Ovary      | 20%             | Germline genotype for BRCA1 and BRCA2 known                                   | BRCA1             | NM_007294     | c.5075-2A>G                 | p.?                   | 62,40%                                                | 58,87% | 57,69%  | 58,9%   |
| Thera36                | Ovary      | 70%             | Germline genotype for BRCA1 and BRCA2 known                                   | BRCA1             | NM_007294     | c.4038_4041del              | p.Arg1347Glufs*18     | 73,40%                                                | 68,12% | 67,45%  | 67,3%   |
| Thera41                | Colon      | 5%              | RAS status known for Exon 2 - 3 - 4                                           | KRAS              | NM_033360     | c.35G>A                     | p.Gly12Asp            | NA                                                    | 1,80%  | 1,90%   | 1,9%    |
| Thera42                | Colon      | 10%             | RAS status known for Exon 2 - 3 - 4                                           | KRAS              | NM_033360     | c.35G>A                     | p.Gly12Asp            | NA                                                    | 6,80%  | 6,84%   | 6,9%    |
| Thera43                | Colon      | 40%             | RAS status known for Exon 2 - 3 - 4                                           | KRAS              | NM_033360     | c.35G>A                     | p.Gly12Asp            | NA                                                    | 11,10% | 10,96%  | 11,2%   |
| Thera44                | Colon      | 20%             | RAS status known for Exon 2 - 3 - 4                                           | NRAS              | NM_002524     | c.181C>A                    | p.Gln61HLys           | 15%                                                   | 15,10% | 14,99%  | 15,1%   |
| Thera45                | Colon      | 30%             | RAS status known for Exon 2 - 3 - 4                                           | KRAS              | NM_033360     | c.182A>G                    | p.Gln61Arg            | NA                                                    | 11%    | 10,76%  | 11,03%  |
| Thera51                | Colon      | 40%             | RAS status known for Exon 2 - 3 - 4                                           | KRAS              | NM_033360     | c.38G>A                     | p.Gly13Asp            | 20,70%                                                | 20,90% | 20,82%  | 20,9%   |
| Thera52                | Colon      | 80%             | RAS status known for Exon 2 - 3 - 4                                           | KRAS              | NM_033360     | c.34G>T                     | p.Gly12Cys            | 12,80%                                                | 13,60% | 13,68%  | 13,6%   |
| Thera54                | Colon      | 10%             | RAS status known for Exon 2 - 3 - 4                                           | KRAS              | NM_033360     | c.351A>T                    | p.Lys117Asn           | 20%                                                   | 18,70% | 18,82%  | 18,8%   |
| Thera55                | Colon      | 20%             | RAS status known for Exon 2 - 3 - 4                                           | KRAS              | NM_033360     | c.436G>A                    | p.Ala146Thr           | 32,60%                                                | 31,80% | 32,07%  | 31,8%   |
| Thera56                | Colon      | 20%             | RAS status known for Exon 2 - 3 - 4                                           | KRAS              | NM_033360     | c.35G>C                     | p.Gly12Ala            | NA                                                    | 9,30%  | 9,23%   | 9,3%    |
| Thera58                | Colon      | 40%             | RAS status known for Exon 2 - 3 - 4                                           | KRAS              | NM_033360     | c.34G>C                     | p.Gly12Arg            | NA                                                    | 9,06%  | 8,92%   | 9,1%    |
| Thera60                | Colon      | 30%             | RAS status known for Exon 2 - 3 - 4                                           | NRAS              | NM_002524     | c.37G>C                     | p.Gly13Arg            | 28%                                                   | 27,30% | 27,26%  | 27,4%   |
| Thera61                | Colon      | 10%             | RAS status known for Exon 2 - 3 - 4                                           | NRAS              | NM_002524     | c.181C>A                    | p.Gln61Lys            | 29,70%                                                | 25,40% | 25,26%  | 25,4%   |
| Thera65                | Ovary      | 60%             | Germline genotype for BRCA1 and BRCA2 known                                   | BRCA2             | NM_000059     | c.4656T>C                   | p.=                   | 72,12%                                                | 69,83% | 70,04%  | 69,8%   |
| Thera69                | Ovary      | 60%             | Germline genotype for BRCA1 and BRCA2 known                                   | BRCA1             | NM_007294     | c.4327C>T                   | p.Arg1443*            | 69,70%                                                | 68,33% | 68,50%  | 68,3%   |
| Thera75                | Colon      | 30%             | RAS status known for Exon 2 - 3 - 4                                           | KRAS              | NM_033360     | c.34_35delinsCT             | p.Gly12Leu            | 27,08%                                                | 27,20% | 26,70%  | 27,2%   |
| Thera76                | Colon      | NA              | RAS status known for Exon 2 - 3 - 4                                           | KRAS              | NM_033360     | c.180_181delinsAA           | p.Gln61Lys            | 15,70%                                                | 16,70% | 16,90%  | 16,7%   |
| Thera78                | Ovary      | 70%             | Germline genotype for BRCA1 and BRCA2 known                                   | BRCA1             | NM_007294     | c.4165_4166del              | p.Ser1389X            | 78,30%                                                | 74,74% | 74,65   | 74,3%   |
| Thera79                | Ovary      | 70%             | Germline genotype for BRCA1 and BRCA2 known                                   | BRCA2             | NM_000059     | c.7558C>T                   | p.Arg2520X            | 90,80%                                                | 89,95% | 90,10%  | 90,0%   |
| Thera80                | Ovary      | NA              | Germline genotype for BRCA1 and BRCA2 known                                   | BRCA2             | NM_000059     | c.6331_6332del              | p.Lys2111GlufsX17     | 94,20%                                                | 91,90% | 90,12%  | 89,8%   |

|           |       |     |                                             |       |           |                     |                  |        |        |        |       |
|-----------|-------|-----|---------------------------------------------|-------|-----------|---------------------|------------------|--------|--------|--------|-------|
| Thera81   | Ovary | 80% | Germline genotype for BRCA1 and BRCA2 known | BRCA2 | NM_000059 | c.8904del           | p.Val2969CysfsX7 | 71%    | 71,56% | 71,19% | 70,7% |
| Thera83   | Ovary | 70% | Germline genotype for BRCA1 and BRCA2 known | BRCA1 | NM_007294 | c.1504_1508del      | p.Leu502AlafsX2  | 87,20% | 75,90% | 75,96% | 75,4% |
| Thera84   | Ovary | 80% | Germline genotype for BRCA1 and BRCA2 known | BRCA1 | NM_007294 | c.212+3A>G          | p.?              | 87,80% | 88,96% | 89,07% | 89,0% |
| Thera86   | Ovary | 80% | Germline genotype for BRCA1 and BRCA2 known | BRCA2 | NM_000059 | c.37_44del          | p.Glu13X         | 82,60% | 65,96% | 65,17% | 64,8% |
| Thera87   | Ovary | 60% | Germline genotype for BRCA1 and BRCA2 known | BRCA2 | NM_000059 | c.7558C>T           | p.Arg2520X       | 94,50% | 93,50% | 93,56% | 93,5% |
| Thera88   | Ovary | 80% | Germline genotype for BRCA1 and BRCA2 known | BRCA1 | NM_007294 | c.4391_4393delinsTT | p.Pro1464LeufsX2 | 78,50% | 77,47% | 77,60% | 77,5% |
| Thera91   | Ovary | 50% | Germline genotype for BRCA1 and BRCA2 known | BRCA2 | NM_000059 | c.7069_7070del      | p.Leu2357ValfsX2 | 90,50% | 89,72% | 89,24% | 89,1% |
| Thera94   | Ovary | 30% | Germline genotype for BRCA1 and BRCA2 known | BRCA2 | NM_000059 | c.7495C>T           | p.Gln2499*       | 45,50% | 45,80% | 45,80% | 45,8% |
| Thera99   | Ovary | NA  | Germline genotype for BRCA1 and BRCA2 known | BRCA1 | NM_007294 | c.2973_2979del      | p.Lys991Asnfs*7  | 65,40% | 60,10% | 60,15% | 59,7% |
| Thera123  | Colon | 20% | RAS status known for Exon 2 - 3 - 4         | KRAS  | NM_033360 | c.38G>A             | p.Gly13Asp       | NA     | 5,90%  | 5,64%  | 6,0%  |
| Thera124  | Colon | 50% | RAS status known for Exon 2 - 3 - 4         | KRAS  | NM_033360 | c.38G>A             | p.Gly13Asp       | 16,60% | 16,40% | 16,63% | 16,4% |
| Thera126  | Colon | 60% | RAS status known for Exon 2 - 3 - 4         | KRAS  | NM_033360 | c.175G>A            | p.Ala59Thr       | 73,90% | 71,40% | 71,27% | 71,4% |
| Thera127  | Colon | 40% | RAS status known for Exon 2 - 3 - 4         | KRAS  | NM_033360 | c.35G>A             | p.Gly12Asp       | 28,27% | 26,67% | 26,32% | 26,7% |
| Thera128  | Colon | 30% | BRAF status known for Exon 15               | BRAF  | NM_004333 | c.1799T>A           | p.Val600Glu      | 37,31% | 36,38% | 36,04% | 36,4% |
| Thera132  | Colon | 50% | RAS status known for Exon 2 - 3 - 4         | KRAS  | NM_033360 | c.35G>C             | p.Gly12Ala       | 39,87% | 39,60% | 39,72% | 39,6% |
| Thera138  | Colon | 40% | RAS status known for Exon 2 - 3 - 4         | KRAS  | NM_033360 | c.38G>A             | p.Gly13Asp       | 54,70% | 54,33% | 54,73% | 54,3% |
| Thera140  | Colon | 60% | RAS status known for Exon 2 - 3 - 4         | KRAS  | NM_033360 | c.35G>T             | p.Gly12Val       | 38,00% | 37,30% | 37,84% | 37,3% |
| Thera146  | Colon | 50% | RAS status known for Exon 2 - 3 - 4         | KRAS  | NM_033360 | c.436G>A            | p.Ala146Thr      | 25,90% | 27,70% | 27,69% | 27,7% |
| Thera148  | Colon | 45% | BRAF status known for Exon 15               | BRAF  | NM_004333 | c.1799T>A           | p.Val600Glu      | 26,80% | 28,60% | 28,16% | 28,6% |
| Thera 151 | Colon | 30% | RAS status known for Exon 2 - 3 - 4         | KRAS  | NM_033360 | c.38G>A             | p.Gly13Asp       | NA     | 9,30%  | 9,42%  | 9,3%  |
| Thera 152 | Colon | 20% | RAS status known for Exon 2 - 3 - 4         | KRAS  | NM_033360 | c.34G>A             | p.Gly12Ser       | 22,30% | 21,40% | 21,25% | 21,4% |
| Thera 153 | Colon | 10% | RAS status known for Exon 2 - 3 - 4         | KRAS  | NM_033360 | c.182A>T            | p.Gln61Lys       | 51%    | 47,80% | 48,13% | 47,8% |
| Thera 155 | Colon | 40% | RAS status known for Exon 2 - 3 - 4         | KRAS  | NM_033360 | c.35G>C             | p.Gly12Ala       | 48%    | 48,80% | 48,92% | 48,8% |
| Thera 157 | Colon | 30% | BRAF status known for Exon 15               | BRAF  | NM_004333 | c.1799T>A           | p.Val600Glu      | 28,70% | 28,50% | 28,37% | 28,6% |
| Thera 158 | Colon | 20% | RAS status known for Exon 2 - 3 - 4         | KRAS  | NM_033360 | c.35G>T             | p.Gly12Val       | 35,20% | 35,70% | 35,70% | 35,7% |
| Thera 159 | Colon | 40% | BRAF status known for Exon 15               | BRAF  | NM_004333 | c.1799T>A           | p.Val600Glu      | 43,80% | 42%    | 42%    | 42,1% |
| Thera 160 | Colon | 20% | RAS status known for Exon 2 - 3 - 4         | KRAS  | NM_033360 | c.34G>A             | p.Gly12Ser       | 14,30% | 13,90% | 14,08% | 14,0% |
| Thera 162 | Colon | 40% | RAS status known for Exon 2 - 3 - 4         | KRAS  | NM_033360 | c.34G>T             | p.Gly12Cys       | 25,40% | 26,60% | 26,76% | 26,6% |
| Thera 163 | Colon | 80% | RAS status known for Exon 2 - 3 - 4         | KRAS  | NM_033360 | c.35G>T             | p.Gly12Val       | 63,80% | 60%    | 60%    | 60,1% |
| Thera173  | Colon | 70% | RAS status known for Exon 2 - 3 - 4         | KRAS  | NM_033360 | c.35G>T             | p.Gly12Val       | 36,50% | 34,60% | 34,49% | 34,6% |
| Thera174  | Colon | 80% | RAS status known for Exon 2 - 3 - 4         | NRAS  | NM_002524 | c.182A>T            | p.Gln61Lys       | 28%    | 29,40% | 29,75% | 29,5% |
| Thera175  | Colon | 50% | RAS status known for Exon 2 - 3 - 4         | KRAS  | NM_033360 | c.34G>T             | p.Gly12Cys       | 35,70% | 34,70% | 34,56% | 34,7% |
| Thera176  | Colon | 50% | RAS status known for Exon 2 - 3 - 4         | KRAS  | NM_033360 | c.38G>A             | p.Gly13Asp       | 34,90% | 35,60% | 35,81% | 35,6% |
| Thera178  | Colon | 30% | BRAF status known for Exon 15               | BRAF  | NM_004333 | c.1799T>A           | p.Val600Glu      | 29,60% | 28,70% | 28,43% | 28,8% |
| Thera179  | Colon | 50% | BRAF status known for Exon 15               | BRAF  | NM_004333 | c.1799T>A           | p.Val600Glu      | 36,30% | 36,30% | 36,31% | 36,3% |
| Thera182  | Colon | NA  | RAS status known for Exon 2 - 3 - 4         | KRAS  | NM_033360 | c.34_35delinsTT     | p.Gly12Phe       | NA     | 12,30% | 12,32% | 12,3% |
